# Supplementary material
Source: PubMed Central journal article supplement (PMC5382101)

Supplementary Figure 1

a

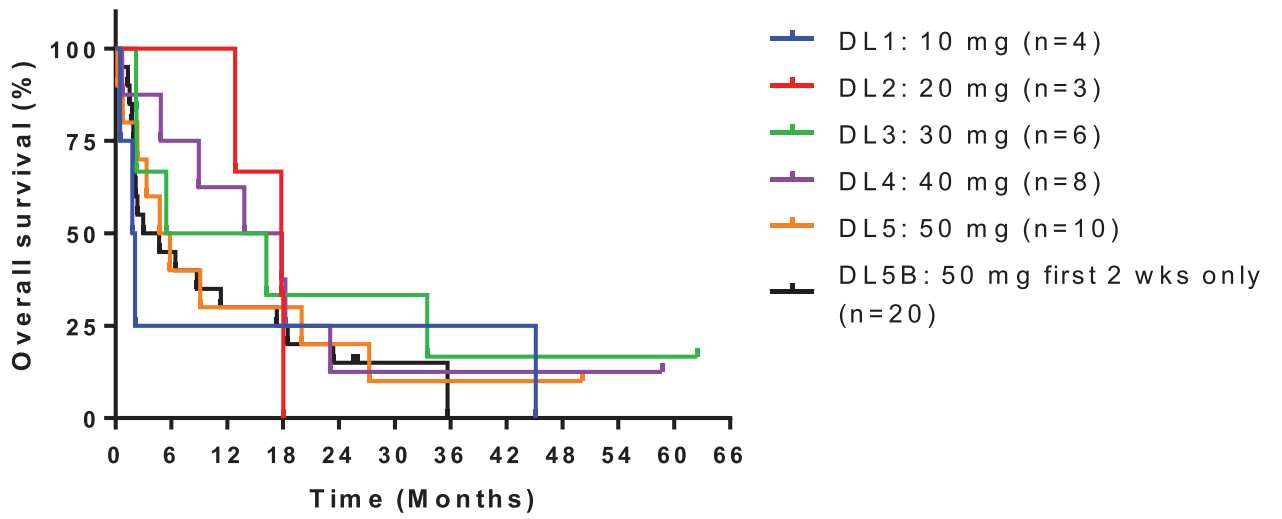

b

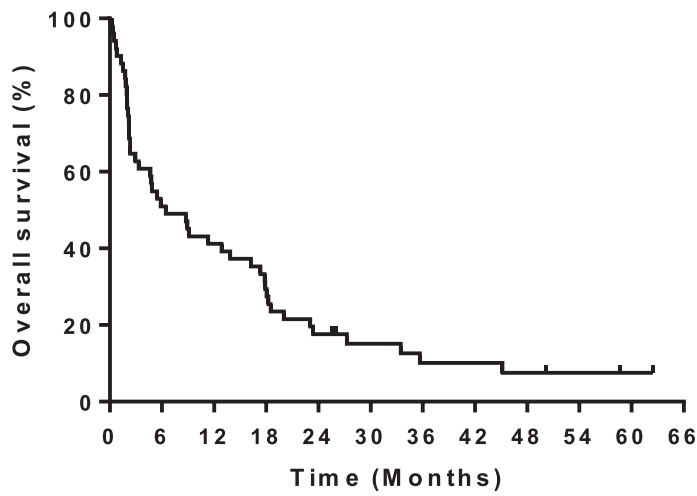

## Supplementary Figure 2

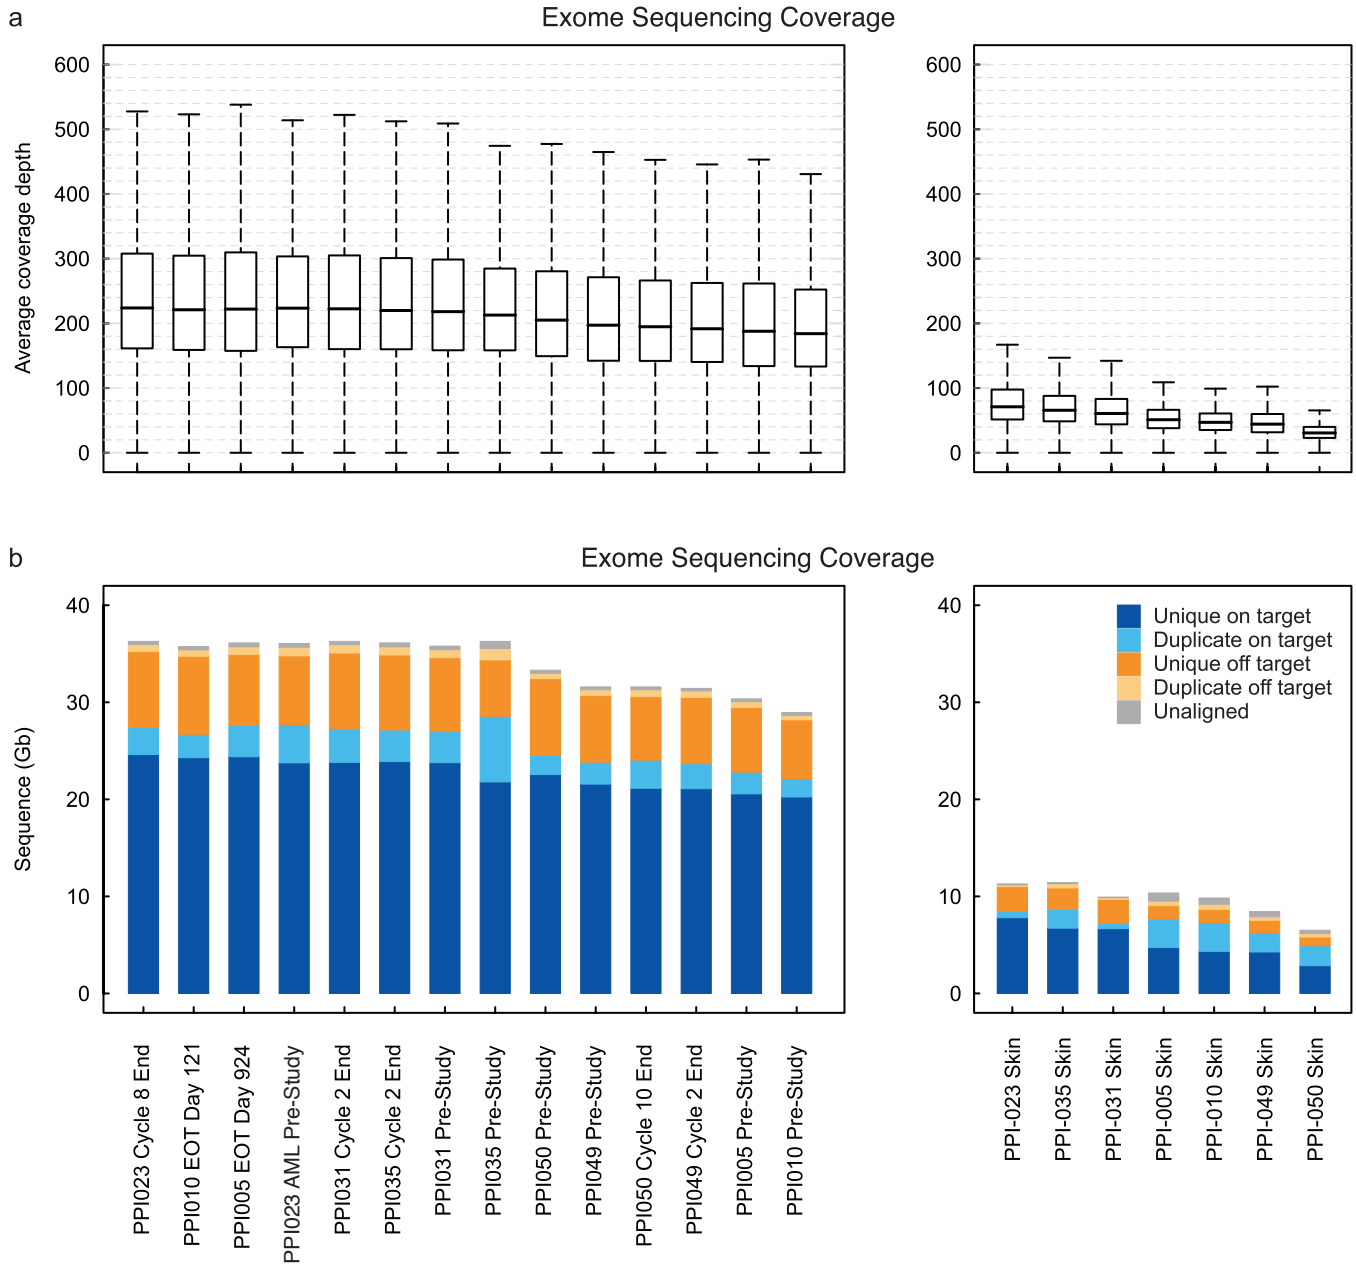

Supplementary Figure 2 (continued)

RMG Sequencing Coverage

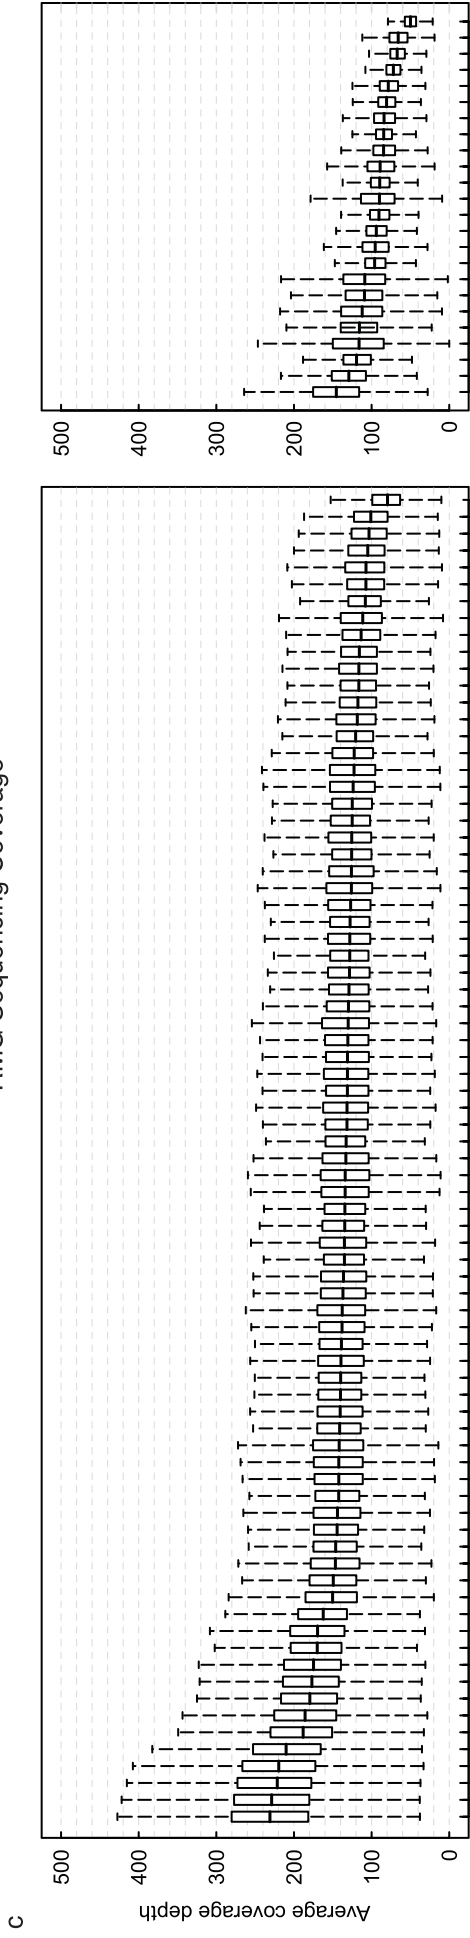

d

RMG Sequencing Coverage

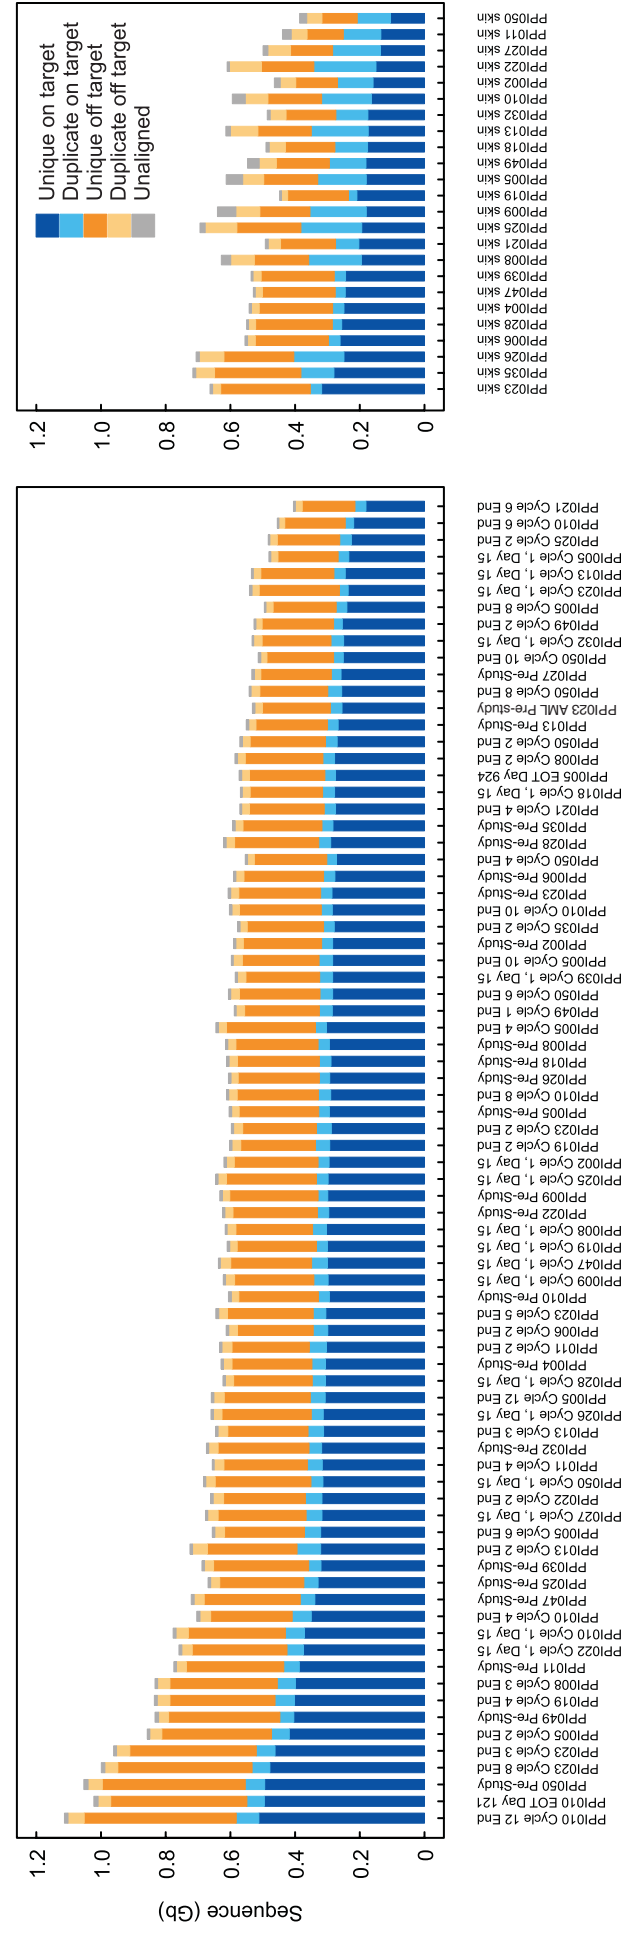

Supplementary Figure 2 (continued)

e

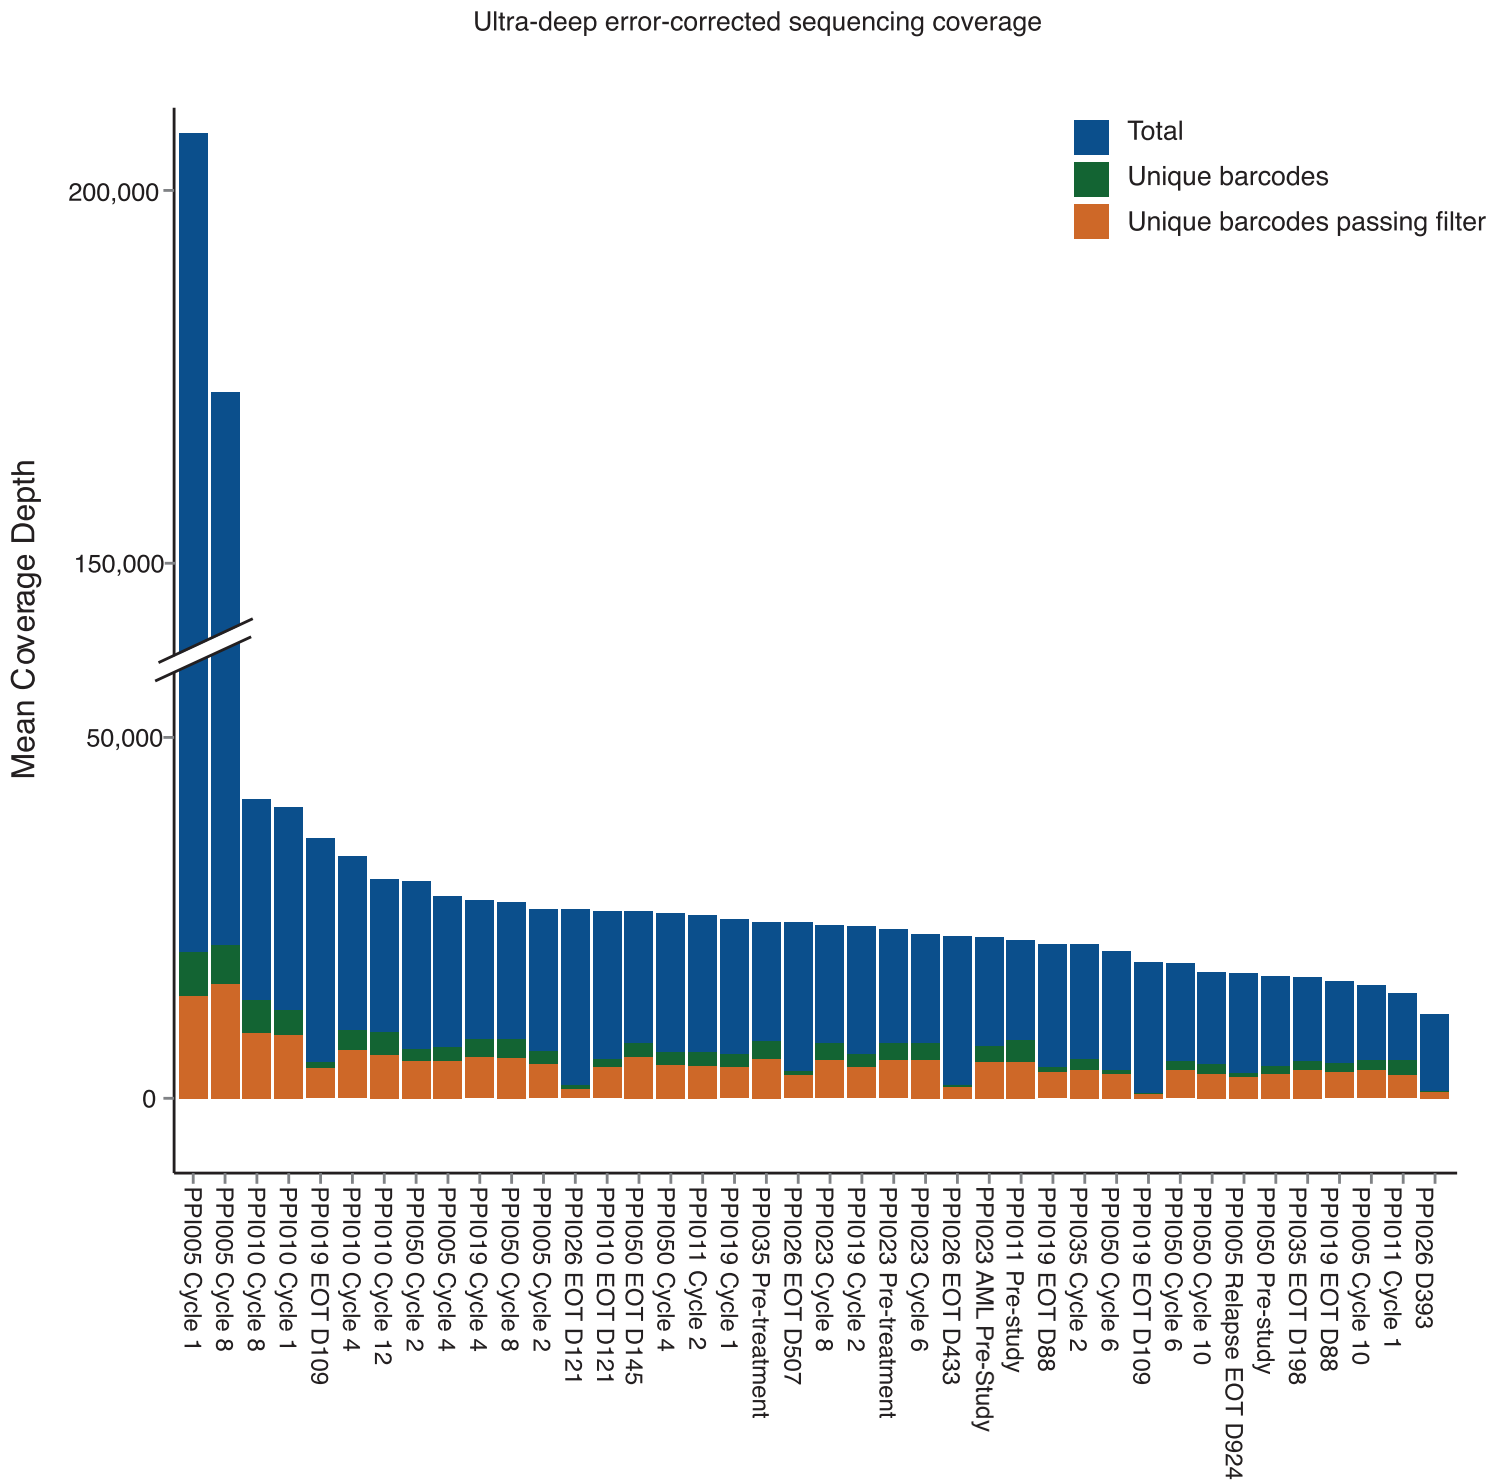

Supplementary Figure 3

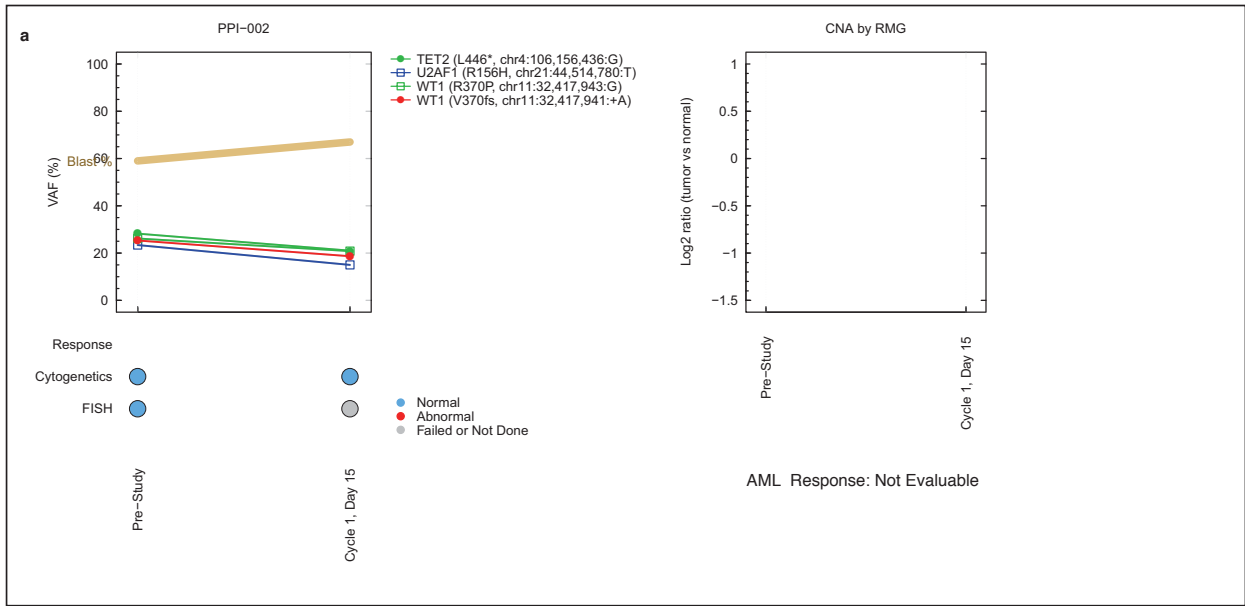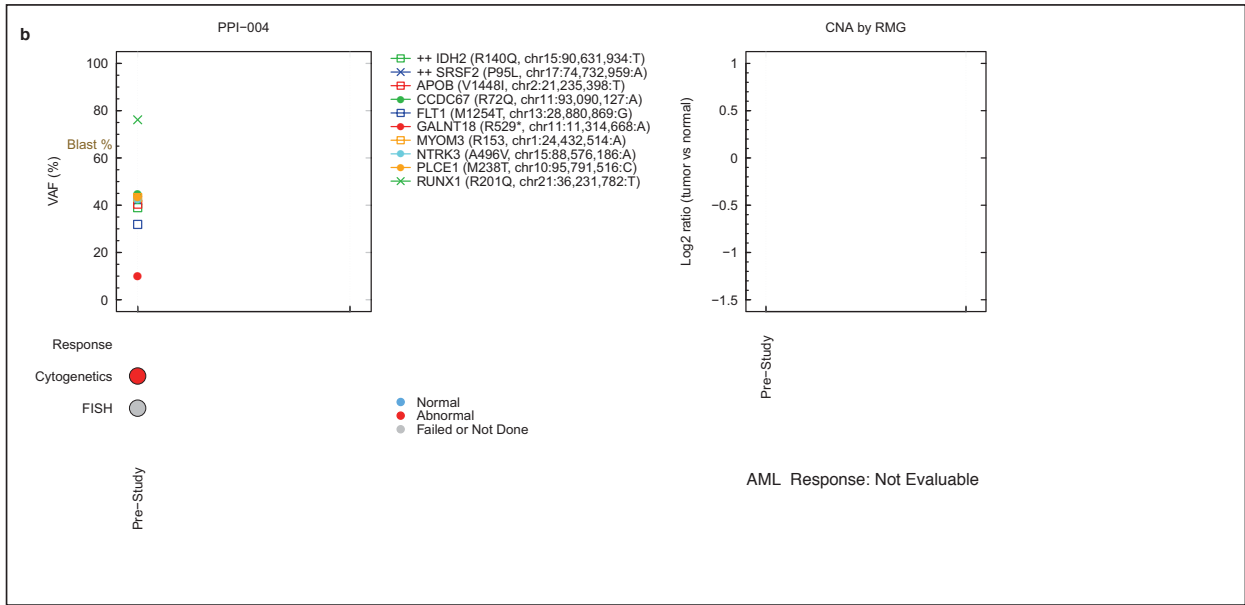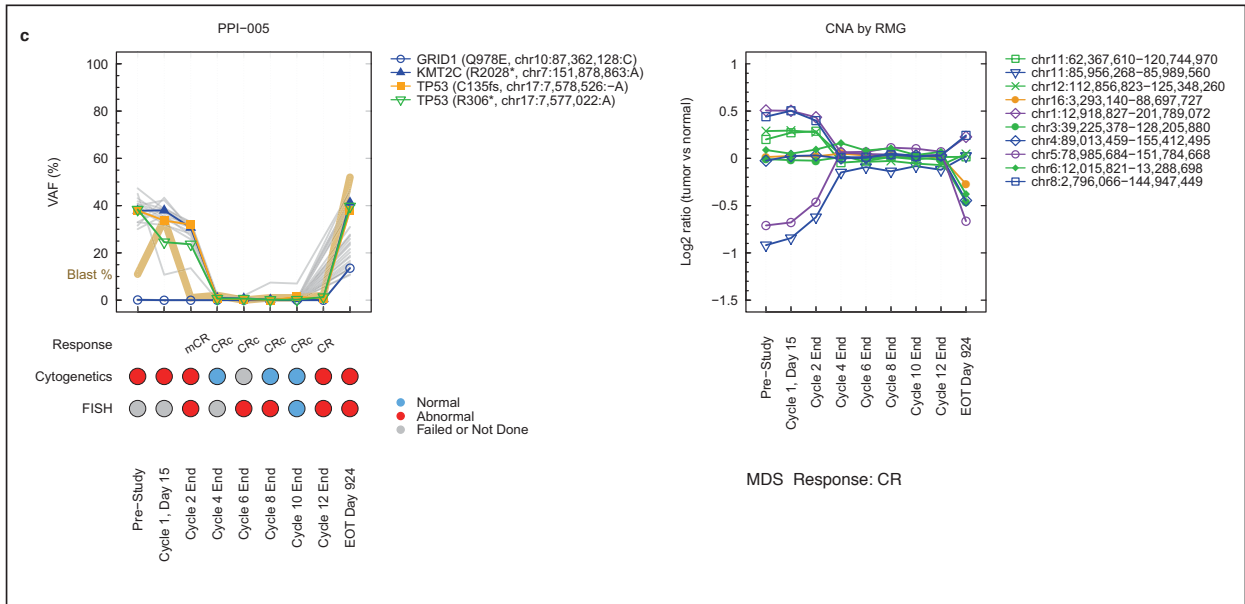

Supplementary Figure 3 (continued)

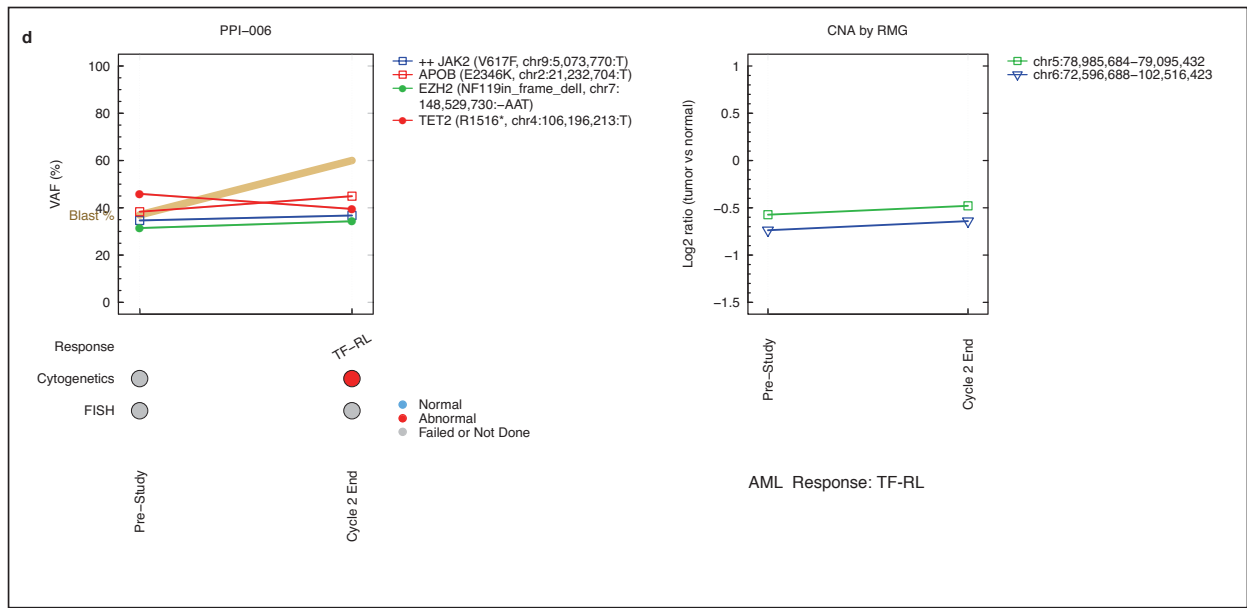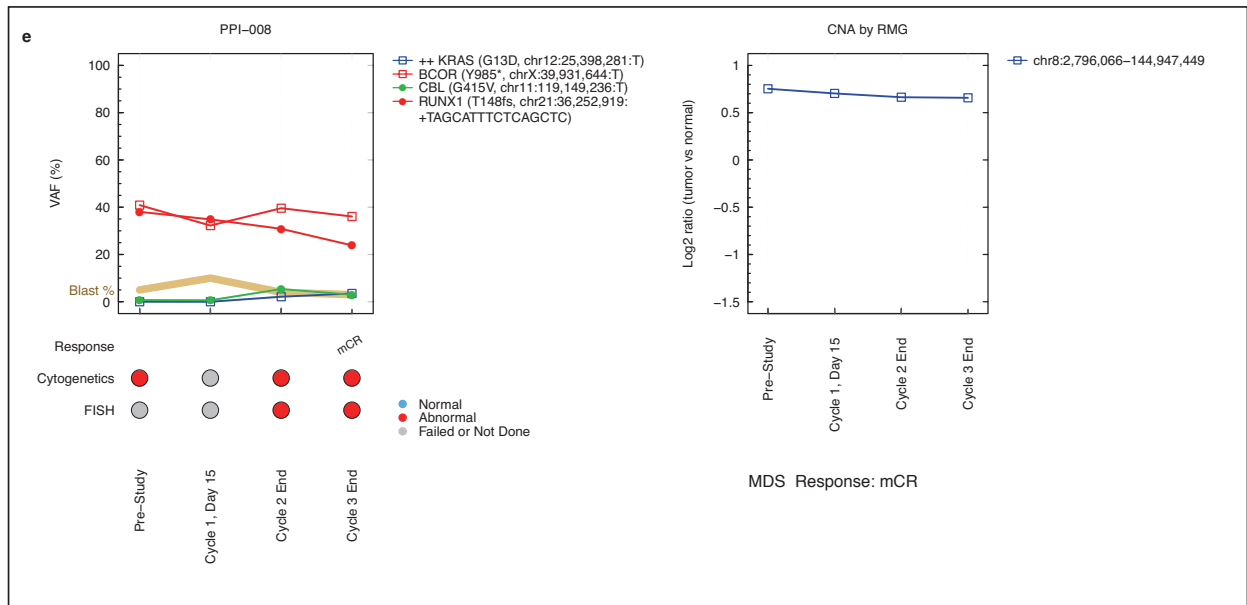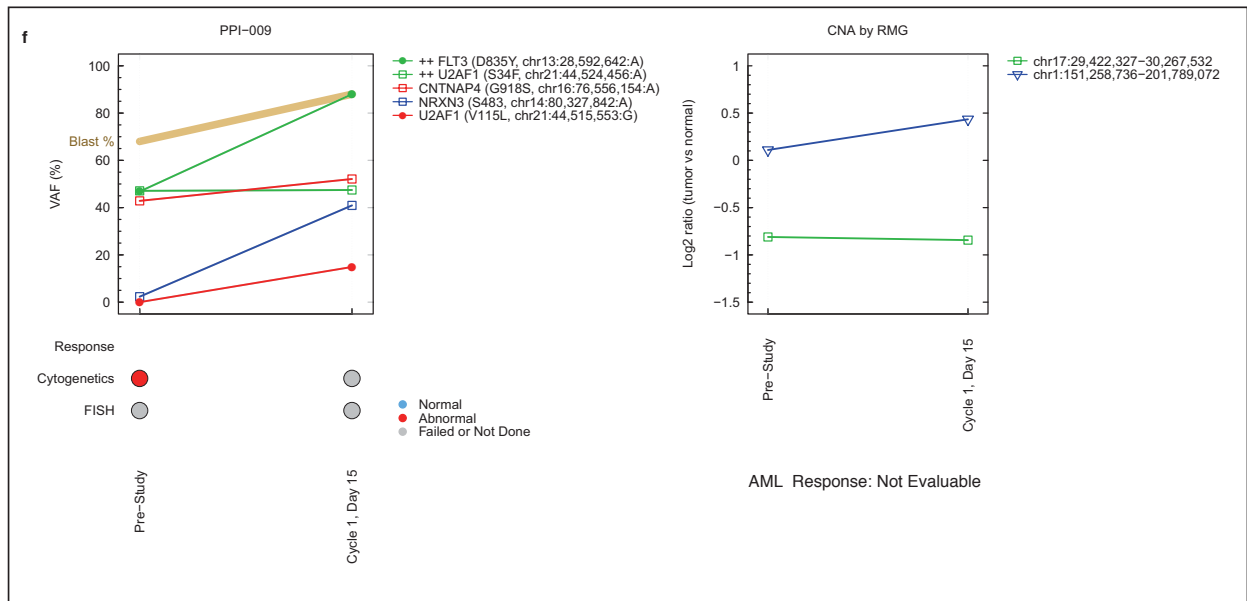

Supplementary Figure 3 (continued)

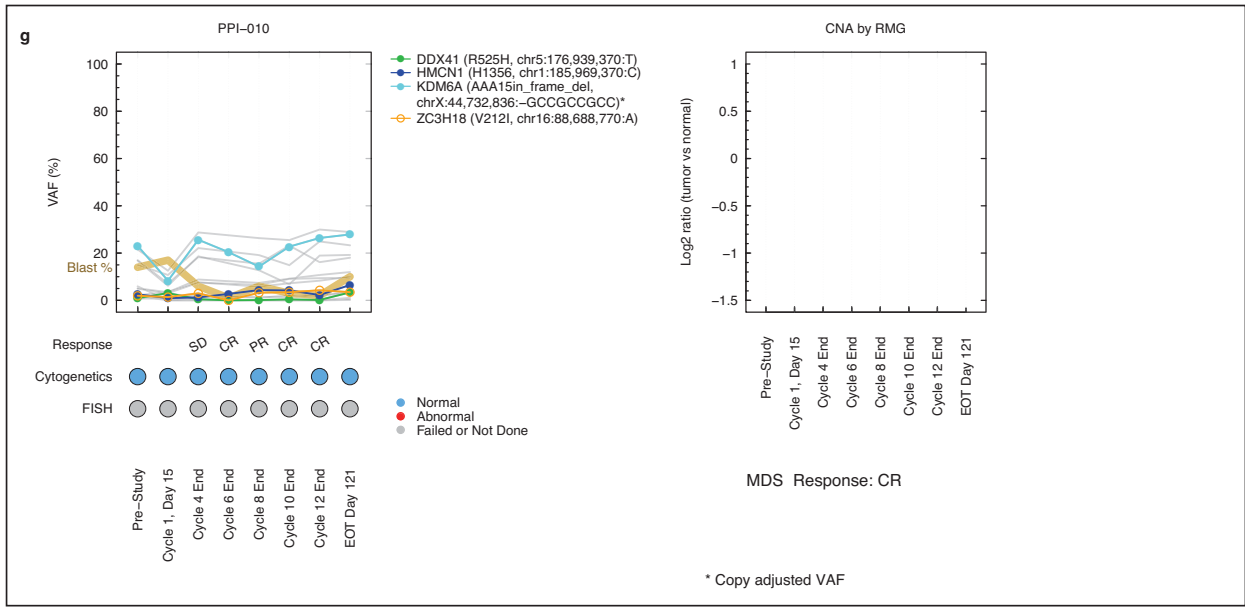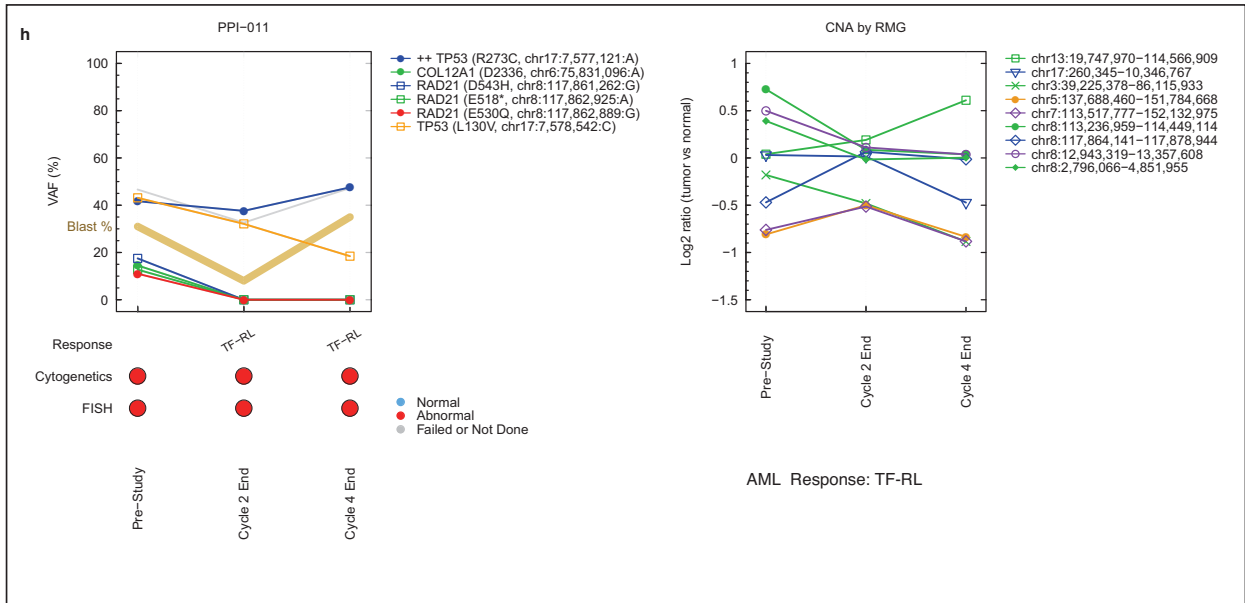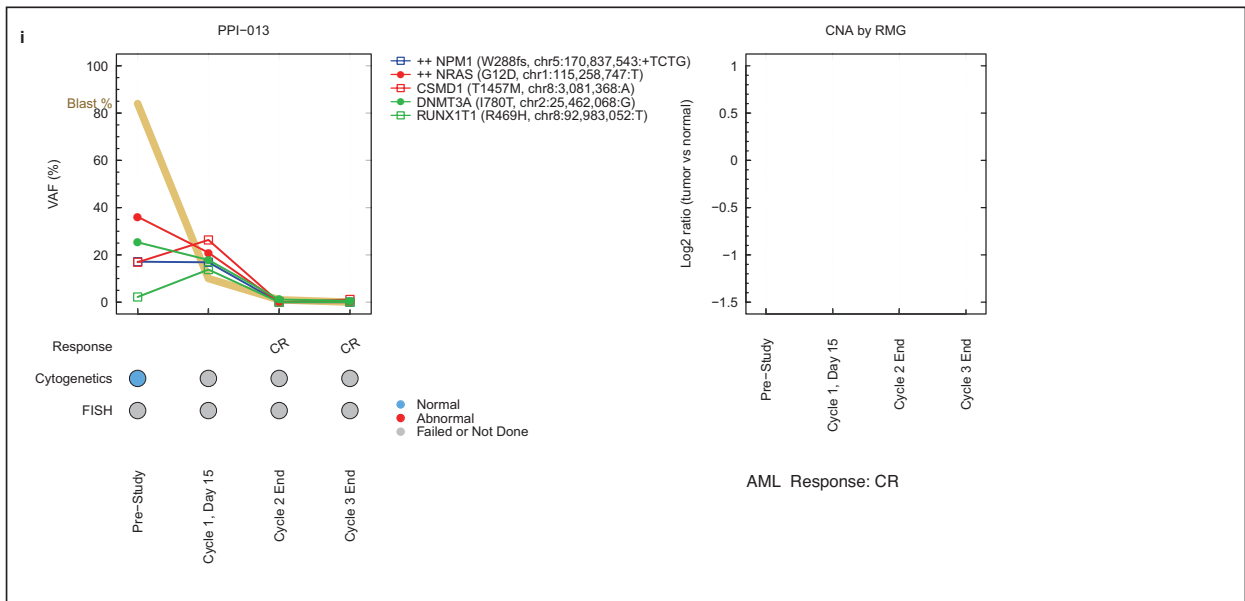

Supplementary Figure 3 (continued)

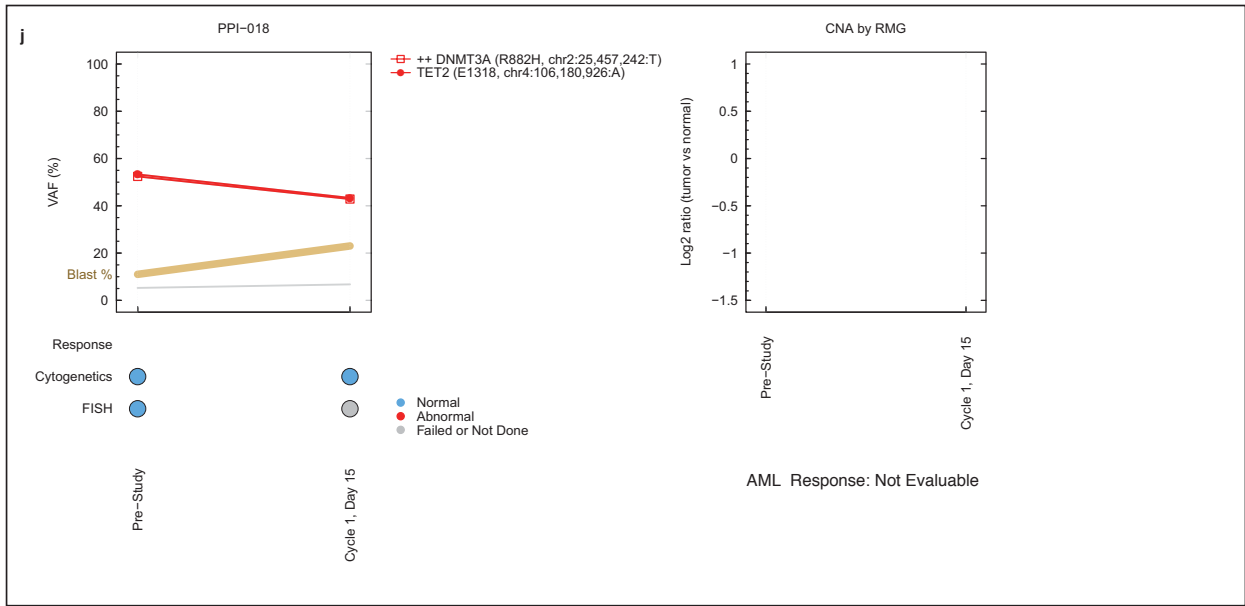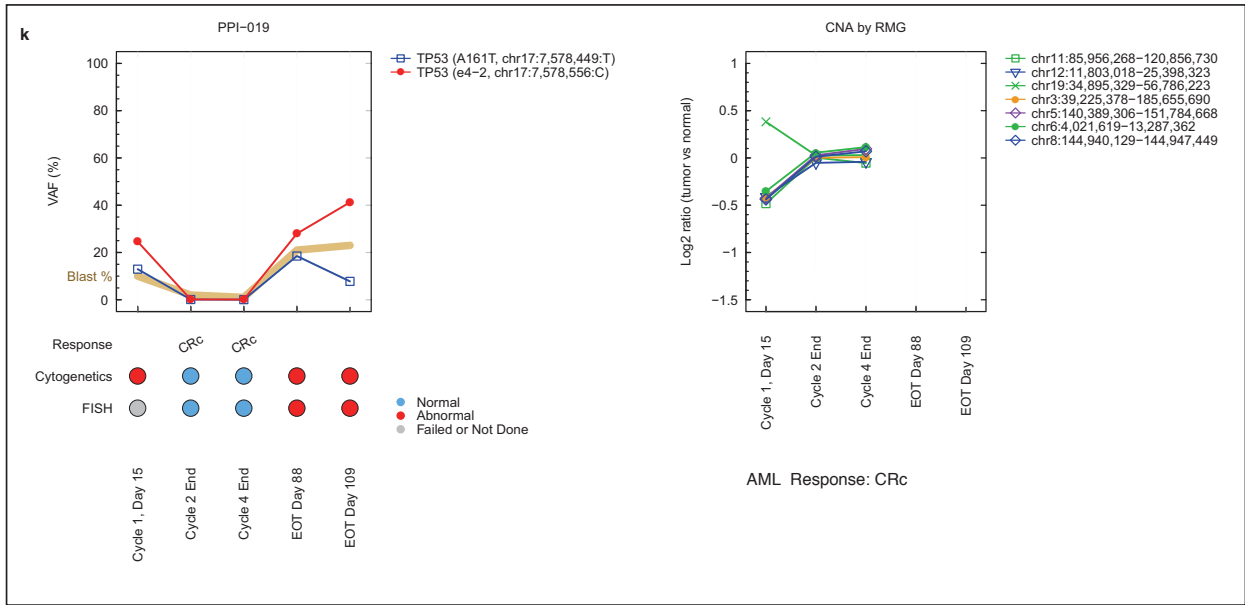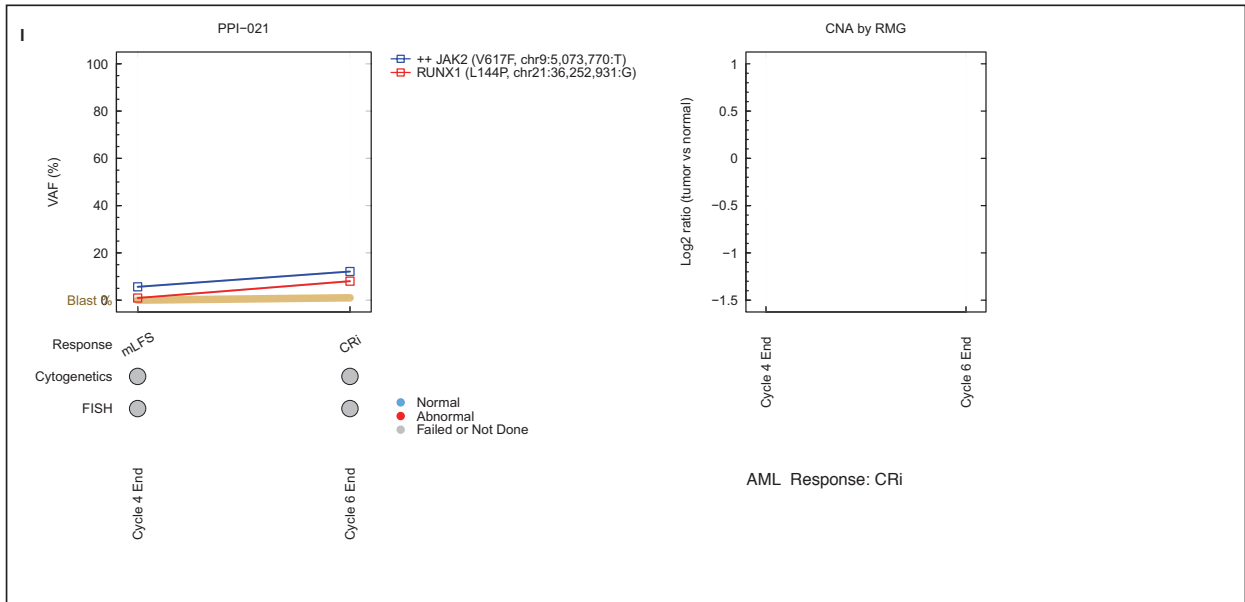



Supplementary Figure 3 (continued)

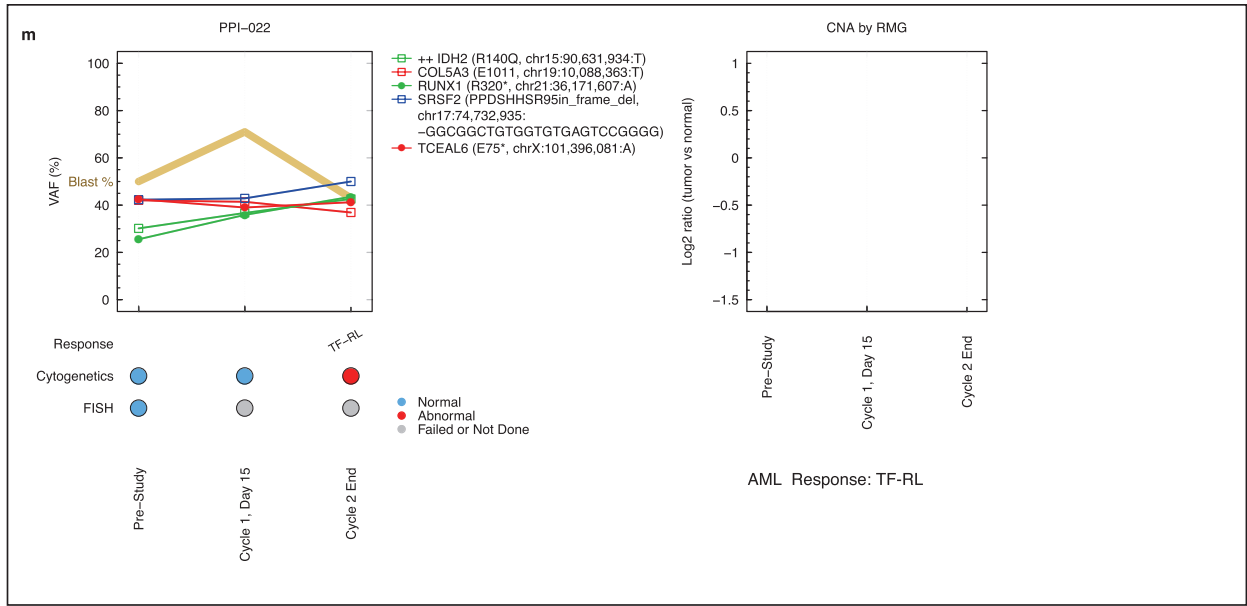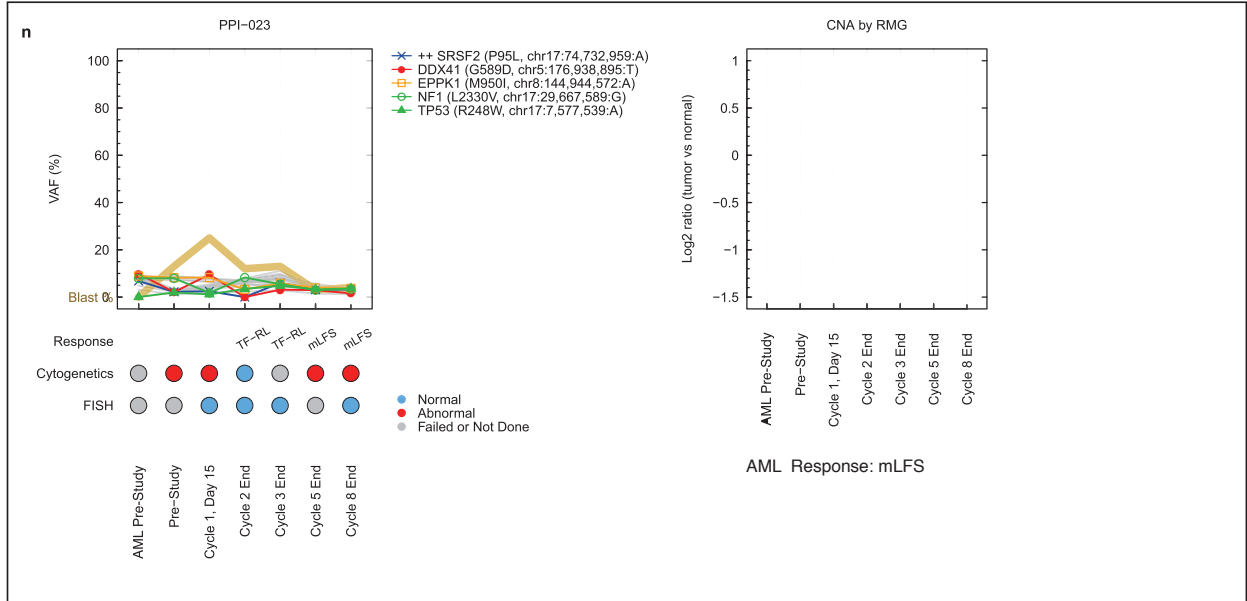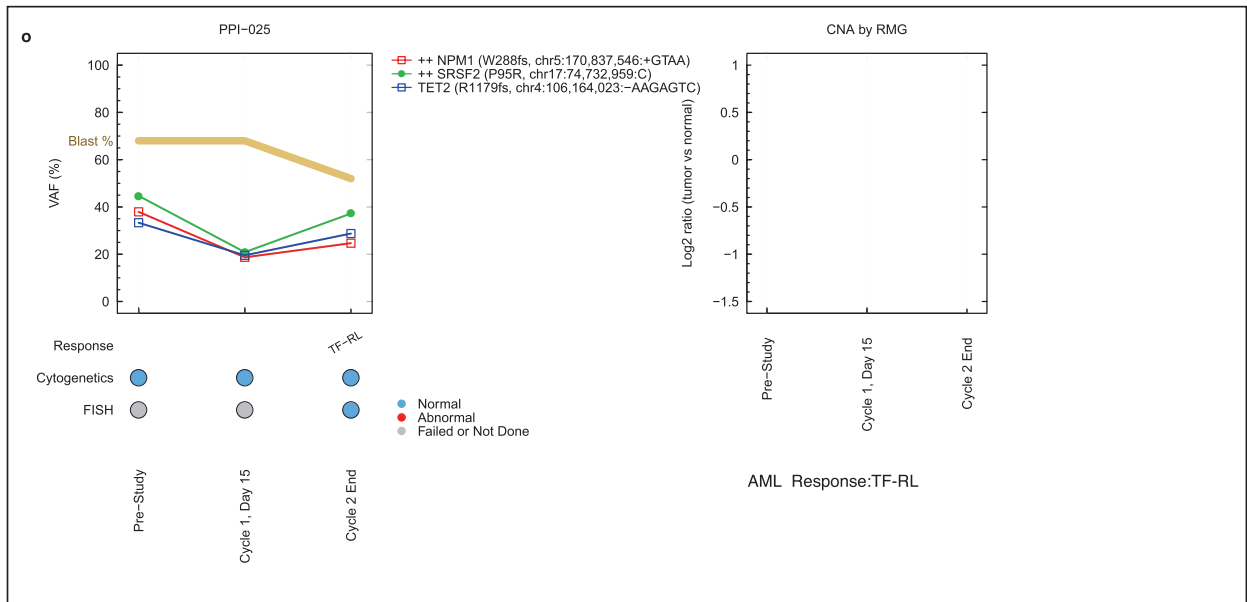

Supplementary Figure 3 (continued)

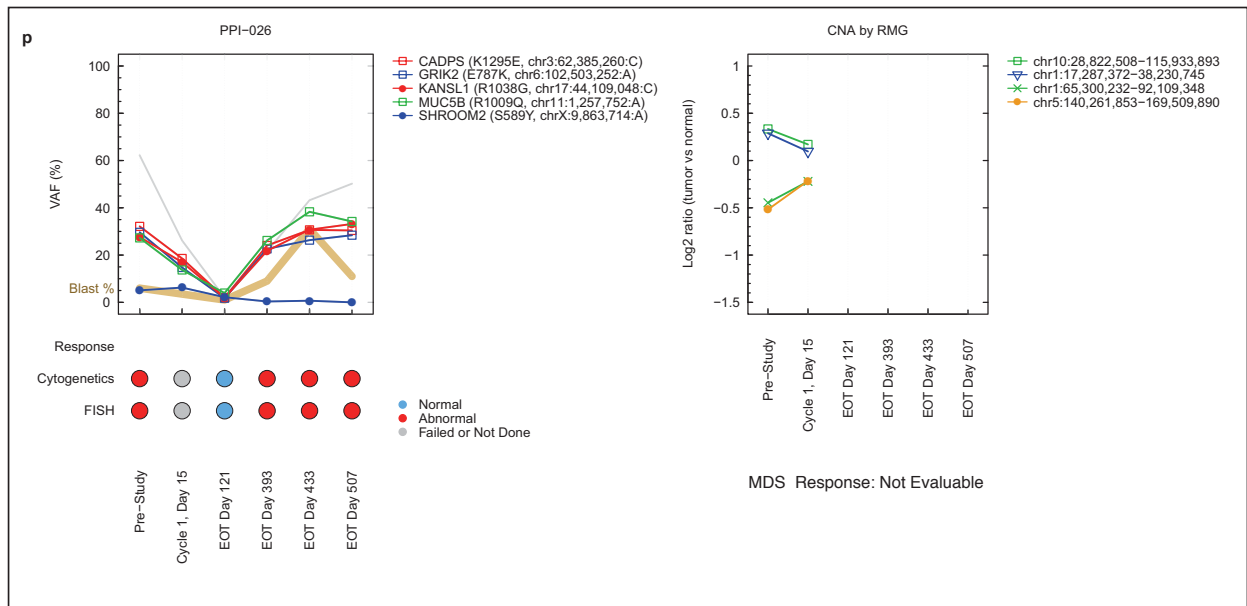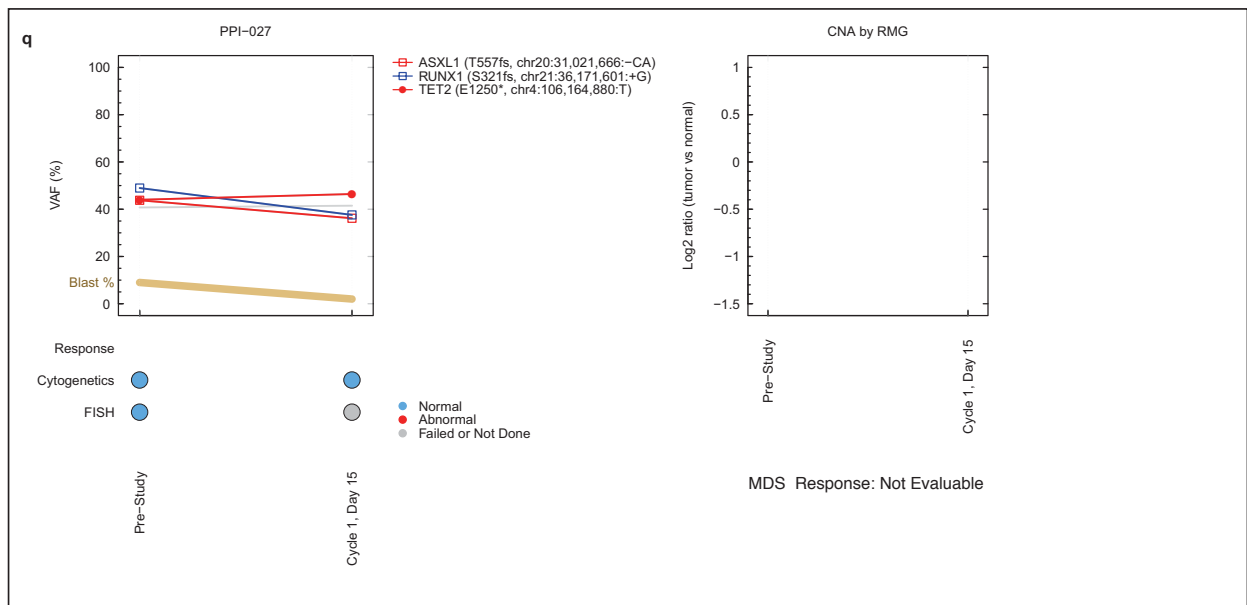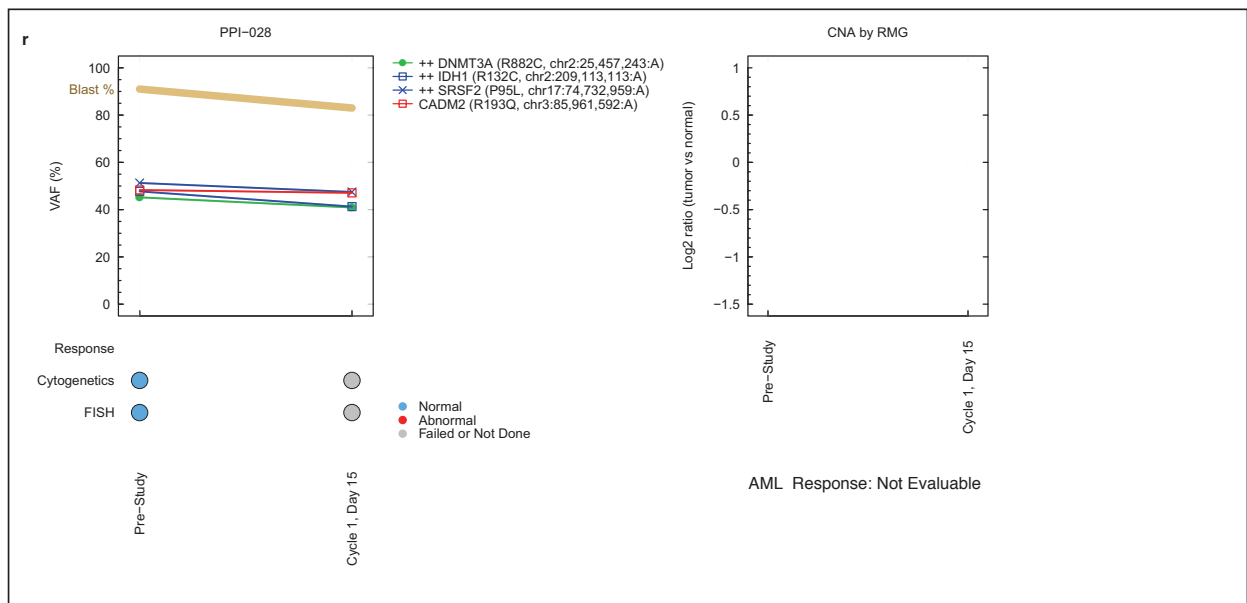

Supplementary Figure 3 (continued)

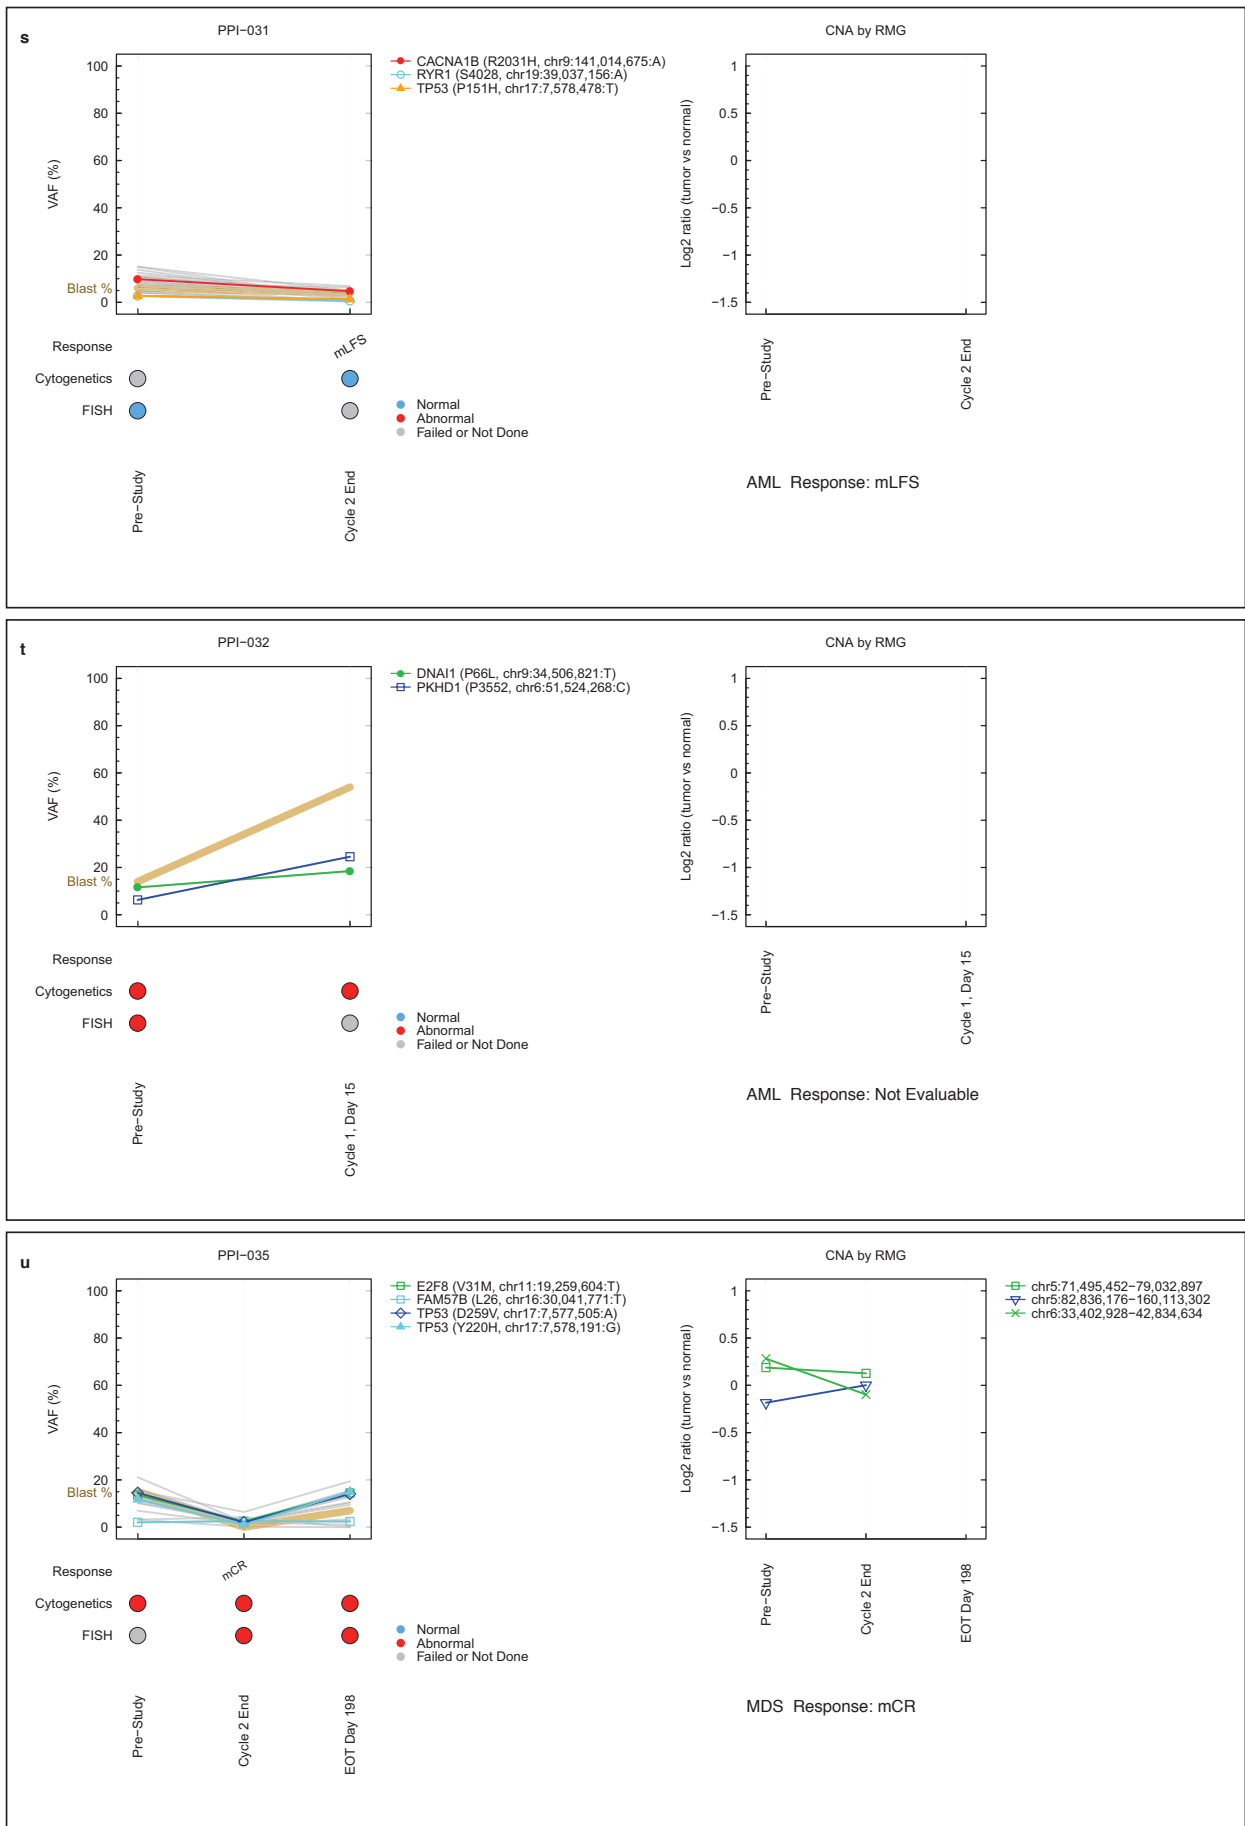

Supplementary Figure 3 (continued)

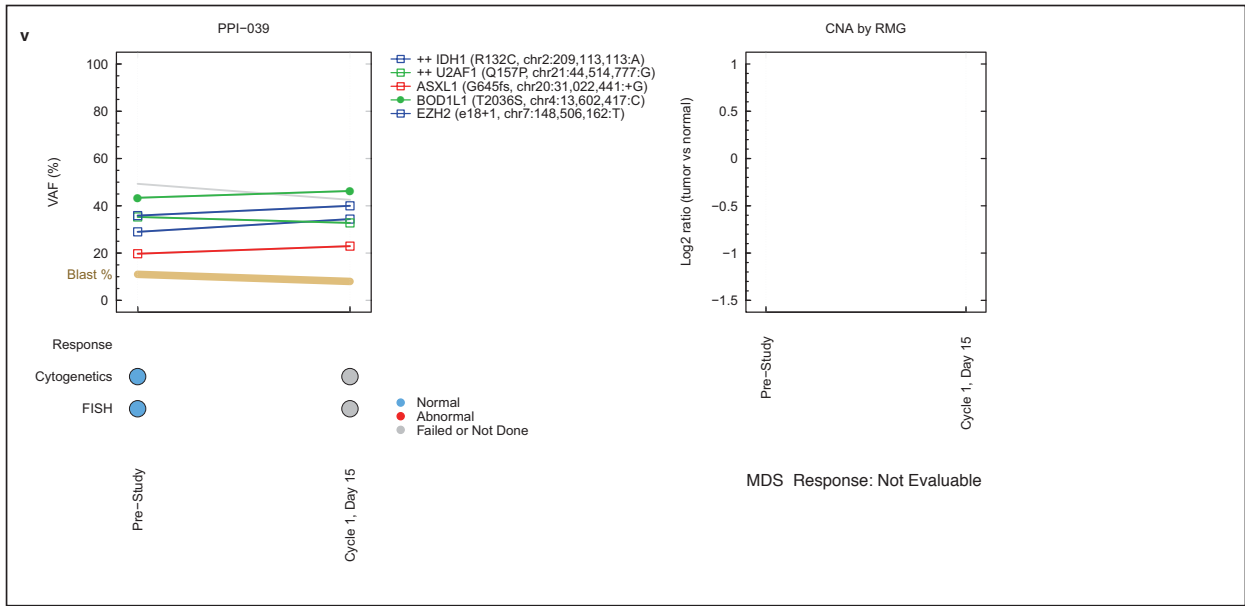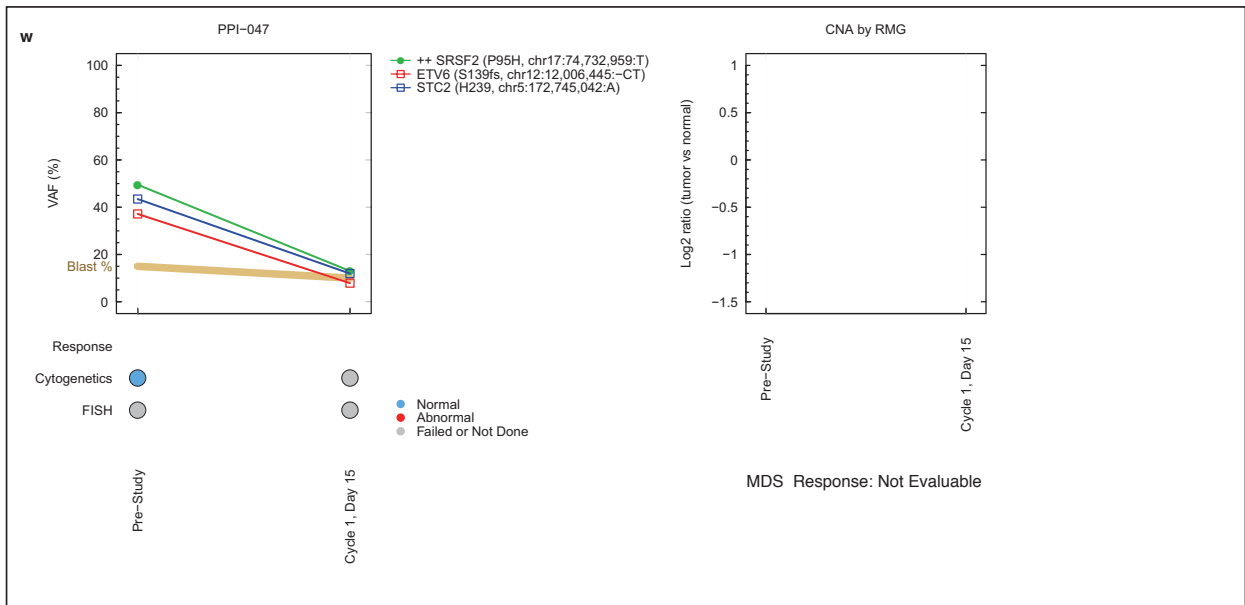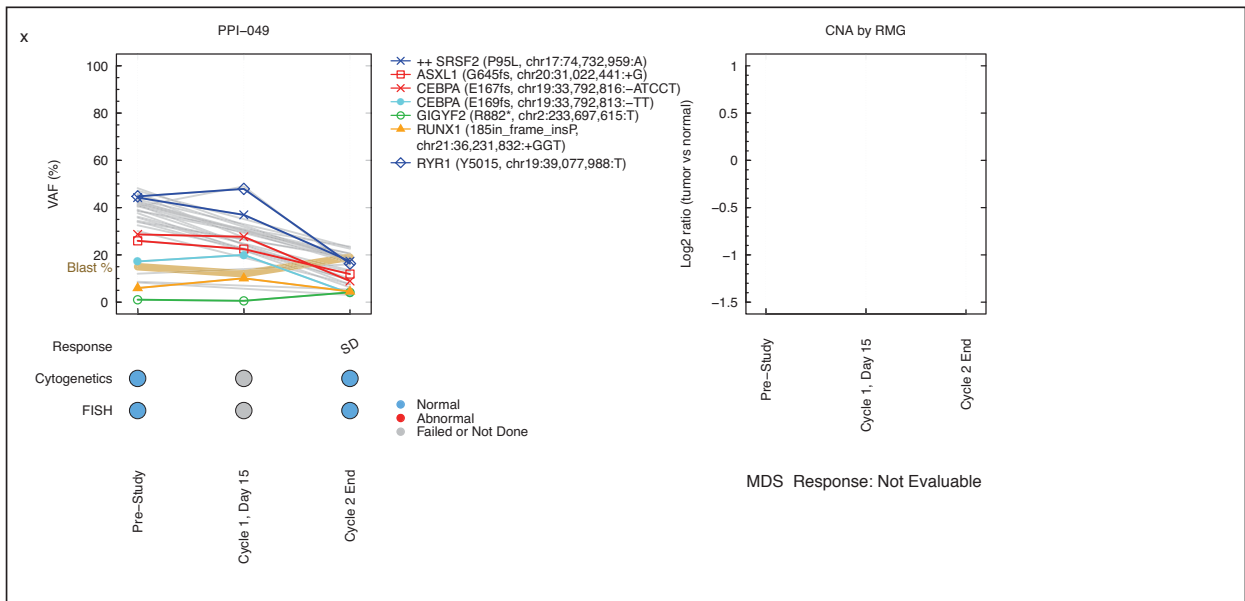

Supplementary Figure 3 (continued)

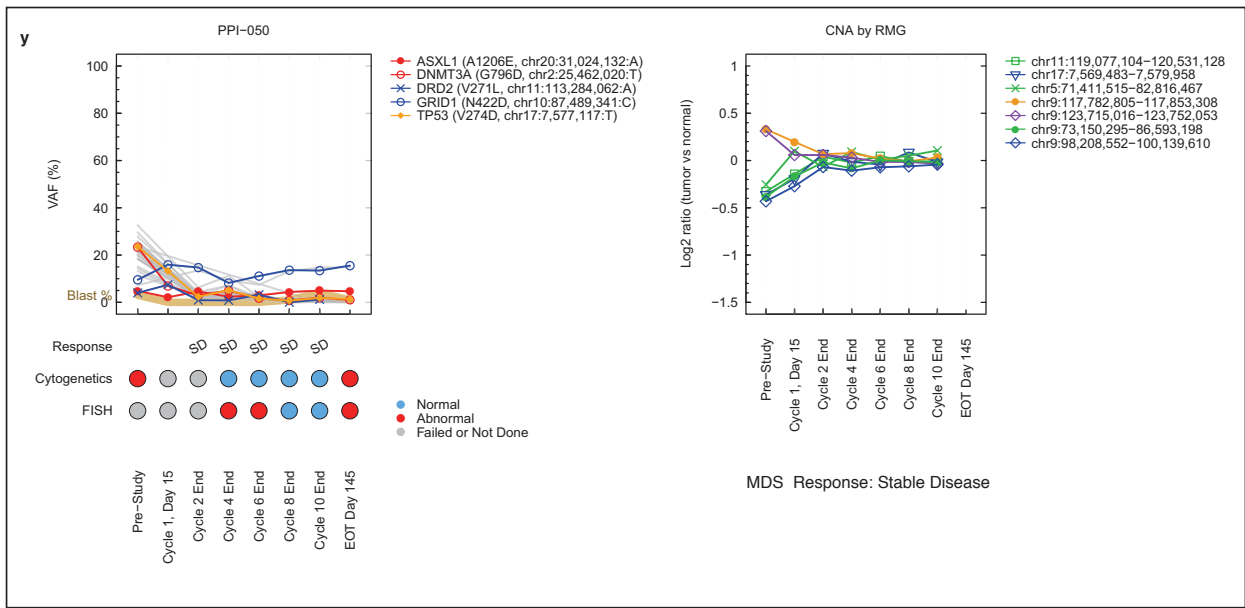

Supplementary Figure 4

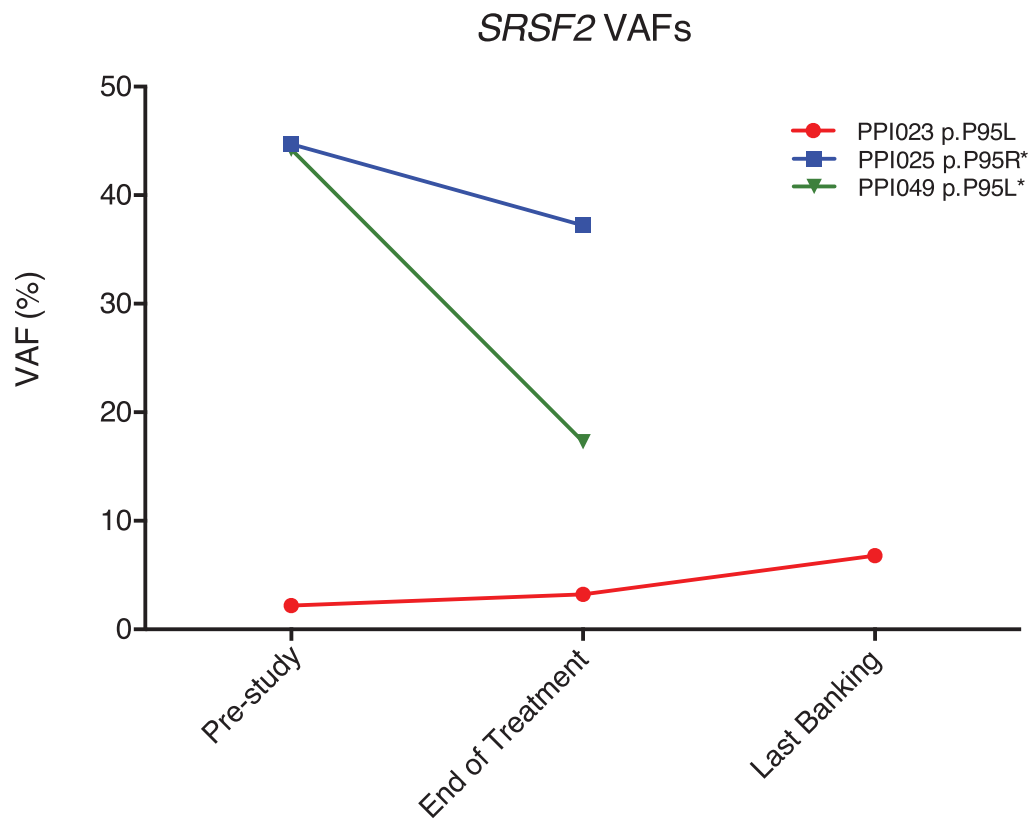

PPI005 Cycle 8  
TP53 p.R306\*

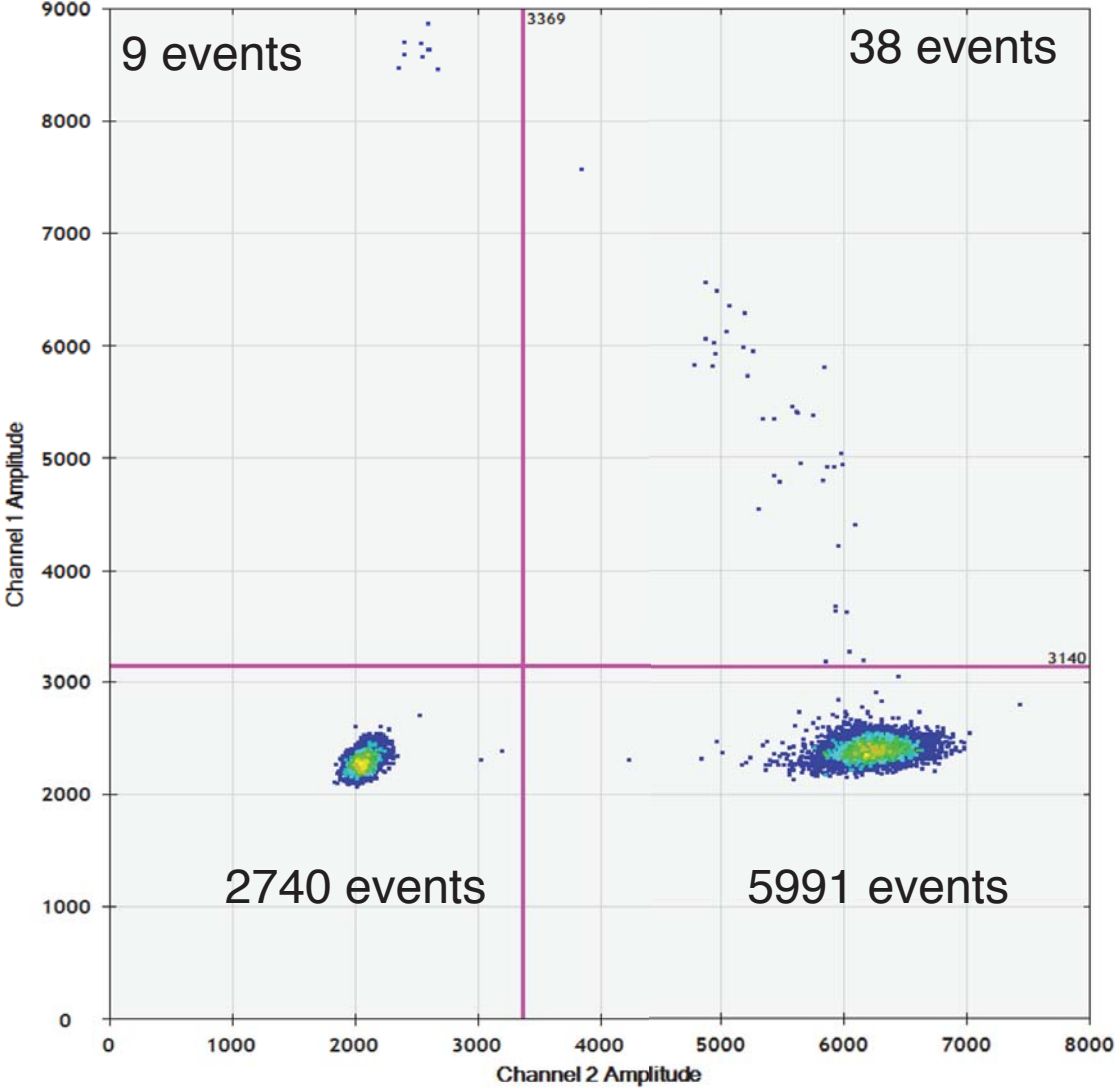

$$VAF = 9 / (5991 + 9) = 0.15\%$$

Supplementary Figure 6

Model prob = 0.297621

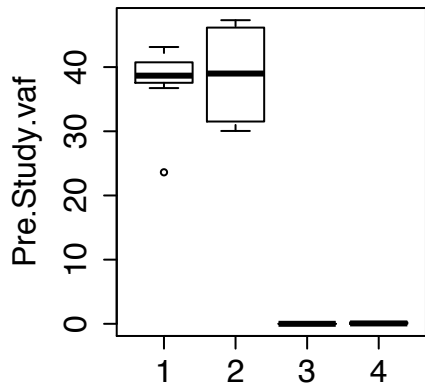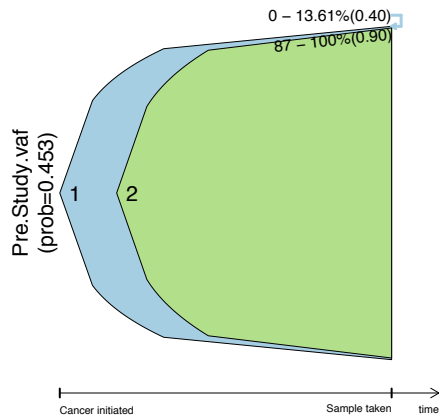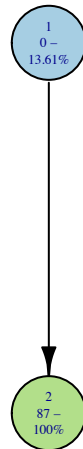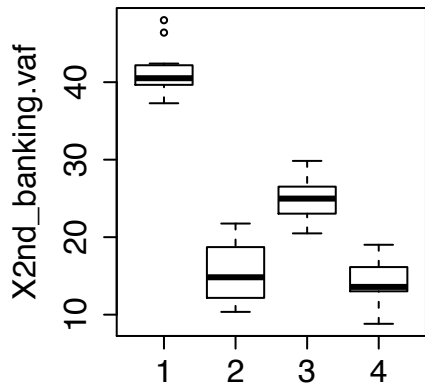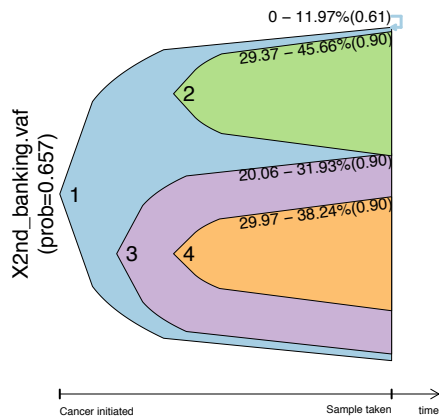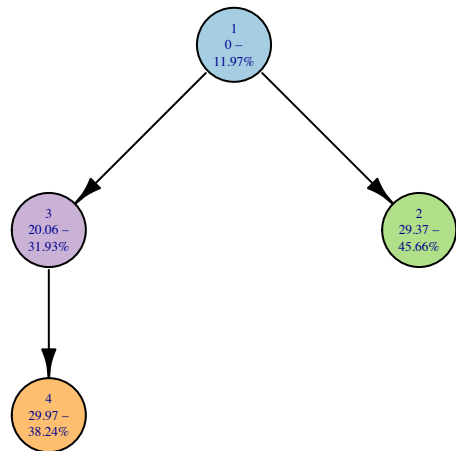



Supplementary Figure 6 (continued)

Model prob = 0.210418047

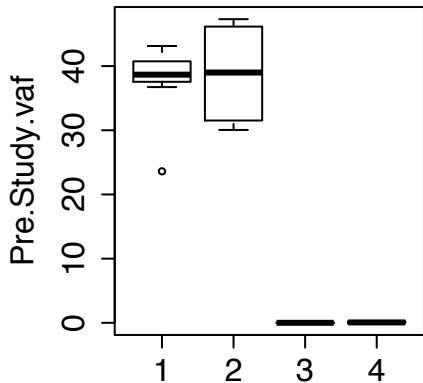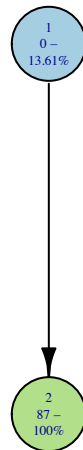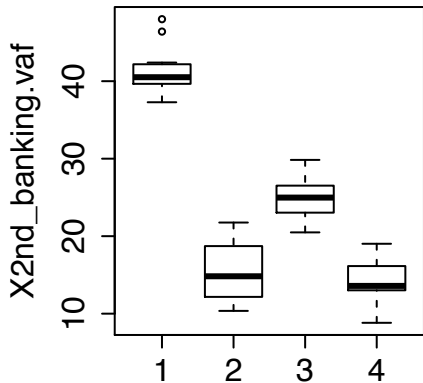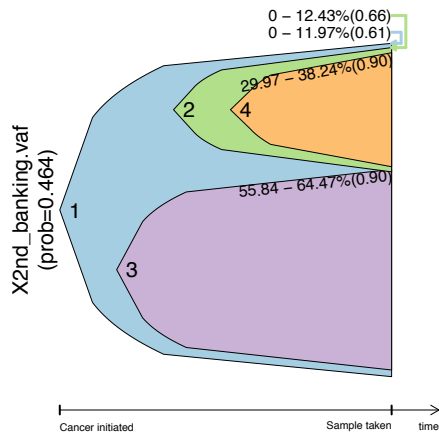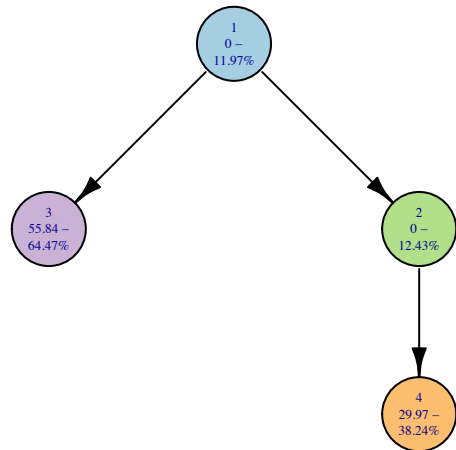

Supplement: NIHMS815232-supplement-2.pdf [file NIHMS815232-supplement-2.pdf]
